# Supplementary material for: Upconversion luminescence and temperature sensing properties of NaGd(WO4)2:Yb3+/Er3+@SiO2 core–shell nanoparticles
Source: Royal Society of Chemistry journal article supplement (doi:10.1039/d0ra10039k), 2021-01-01
Supplement: d0ra10039k1.pdf [file d0ra10039k1.pdf]

## Supporting Information

### Upconversion Luminescence and Temperature Sensing Properties of $\text{NaGd}(\text{WO}_4)_2: \text{Yb}^{3+}/\text{Er}^{3+}@\text{SiO}_2$ Core-Shell Nanoparticles

Lu Zheng,<sup>1</sup> Xinyi Huang,<sup>1</sup> Jiuping Zhong,<sup>1,\*</sup> Zijun Wang,<sup>2</sup> Xiaoning Cheng,<sup>3</sup>

1. School of Materials, Sun Yat-sen University, Guangzhou 510275, China
2. Laboratoire de Physique de la Matière Condensée, Ecole Polytechnique, CNRS, IP Paris, Palaiseau, 91128, France.
3. Instrumental Analysis & Research Center, Sun Yat-sen University, Guangzhou 510275, China

\*Corresponding author: [zhongjp@mail.sysu.edu.cn](mailto:zhongjp@mail.sysu.edu.cn)

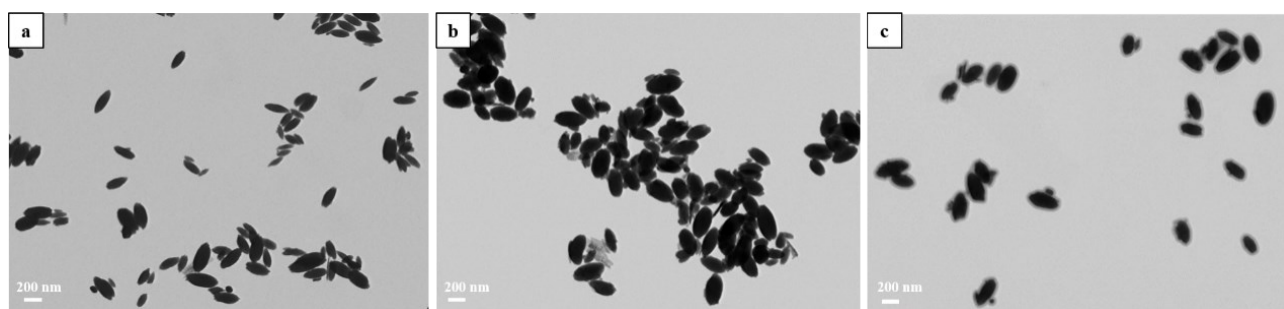

Figure S1. STEM images of core  $\text{NGW}:\text{Yb}^{3+}/\text{Er}^{3+}$  UCNPs (a) before annealing and (b) annealed at 600 °C for 3 h, and (c) core-shell  $\text{NGW}:\text{Yb}^{3+}/\text{Er}^{3+}@\text{SiO}_2$  UCNPs annealed at 600 °C for 3 h.

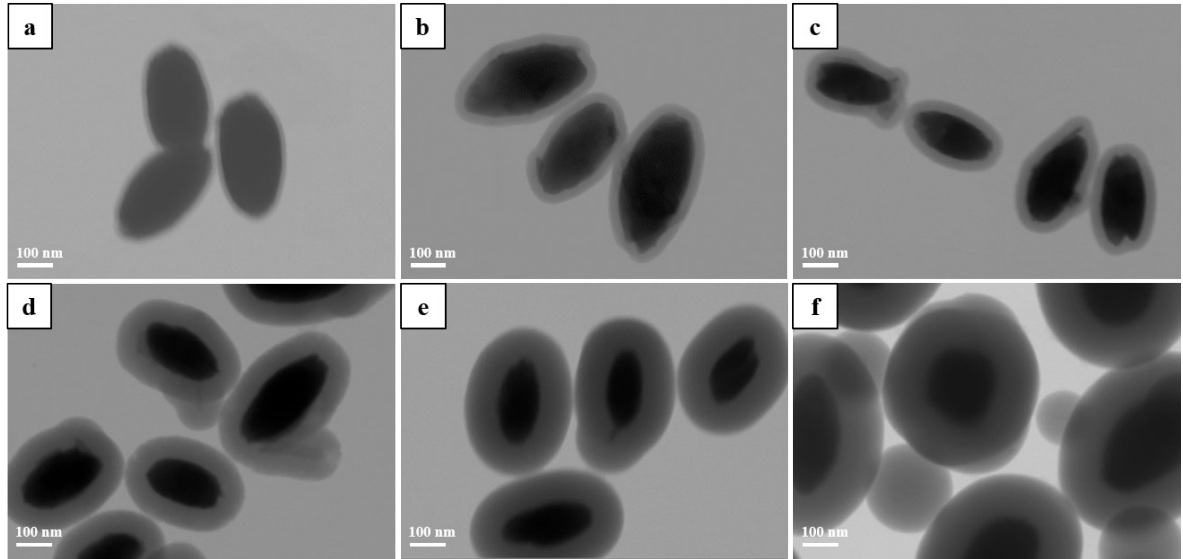

Figure S2. STEM images of core-shell NGW:Yb<sup>3+</sup>/Er<sup>3+</sup>@SiO<sub>2</sub> UCNPs with different amounts of TEOS: a) 10  $\mu$ L, b) 20  $\mu$ L, c) 40  $\mu$ L, d) 80  $\mu$ L, e) 160  $\mu$ L, and f) 320  $\mu$ L.

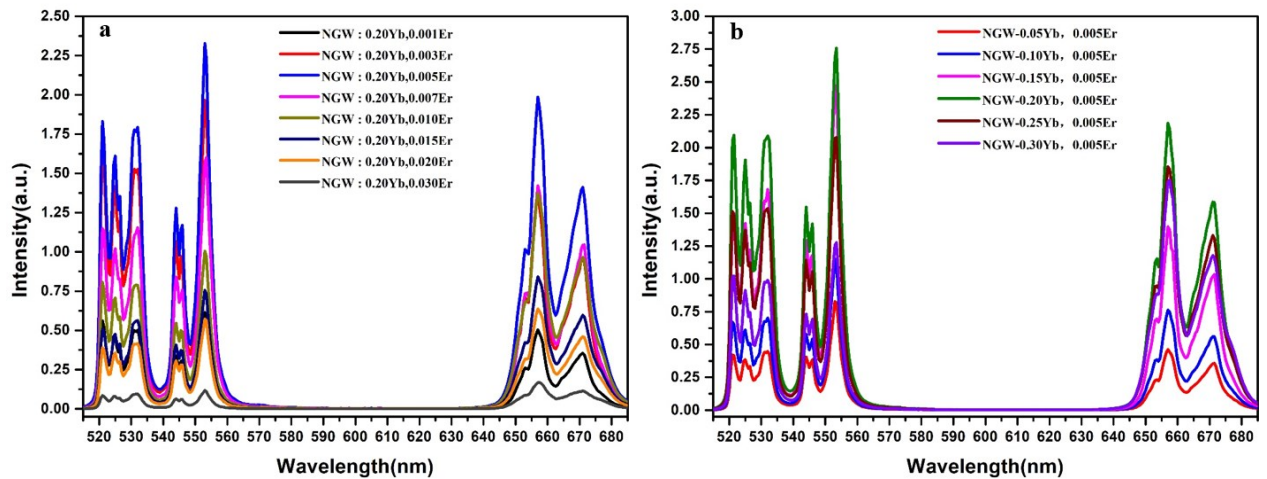

Figure S3. Concentration dependent UC emission spectra of (a) 20 at%Yb<sup>3+</sup>-x at%Er<sup>3+</sup>: NaGd(WO<sub>4</sub>)<sub>2</sub> (x = 0.1, 0.3, 0.5, 0.7, 1.0, 2.0 and 3.0) and (b) x at%Yb<sup>3+</sup>-0.5 at%Er<sup>3+</sup>: NaGd(WO<sub>4</sub>)<sub>2</sub> (y = 5, 10, 15, 20, 25 and 30) UCNPs.

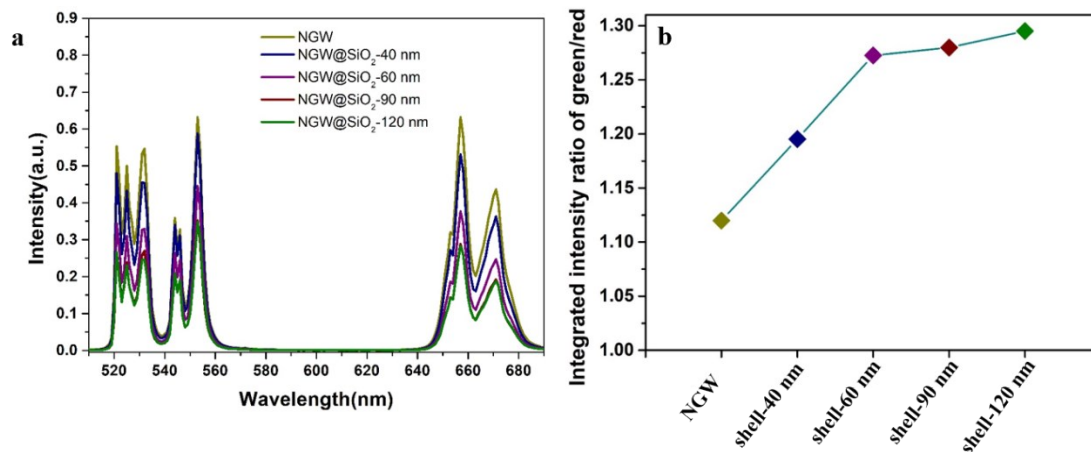

Figure S4. UC luminescence for the core-shell NGW Yb<sup>3+</sup>/Er<sup>3+</sup>@SiO<sub>2</sub> UCNP with different shell thickness under excitation of 980 nm laser. (a) UC emission spectra. (b) Integrated intensity ratio of green and red emission. (power density of 56 mW/cm<sup>2</sup>).

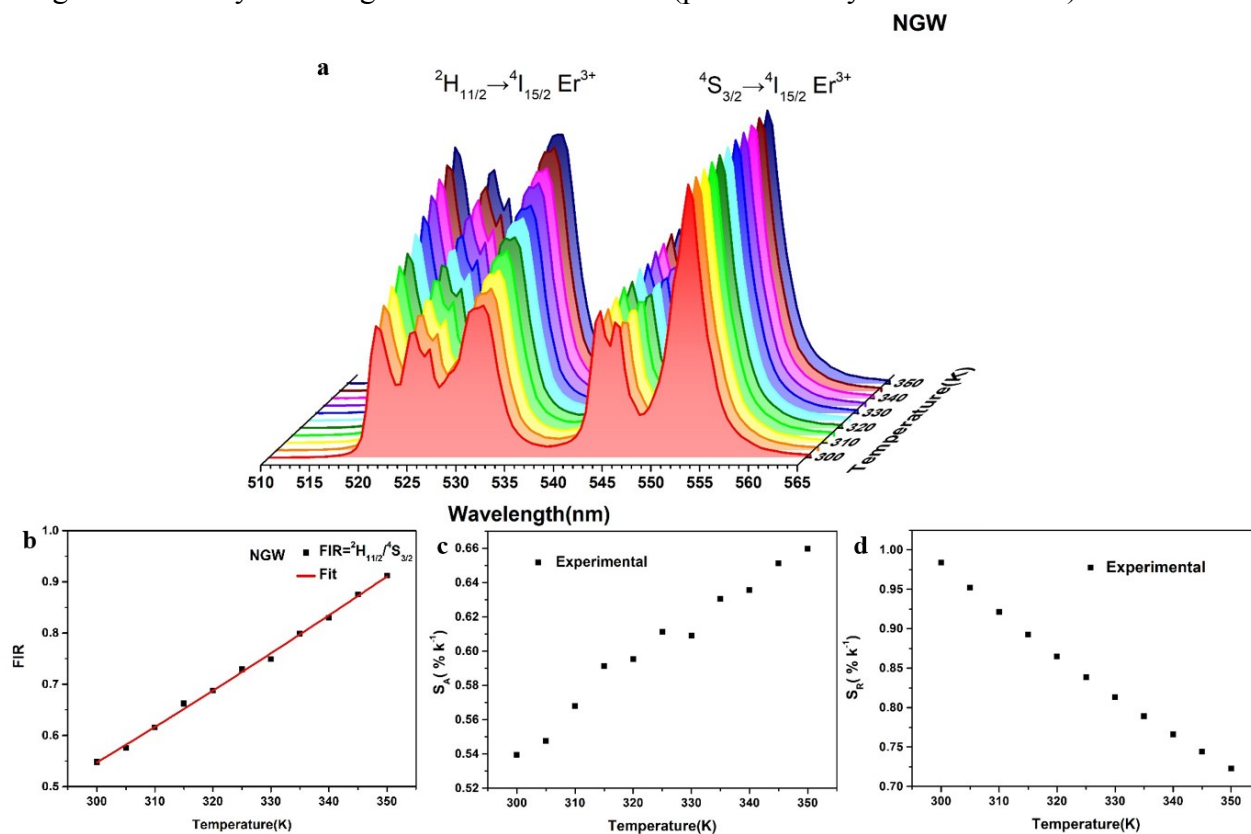

Figure S5. FIR analysis of the <sup>2</sup>H<sub>11/2</sub> and <sup>4</sup>S<sub>3/2</sub> levels emission for the core NGW:Yb<sup>3+</sup>/Er<sup>3+</sup> UCNP in the temperature range from 300 K to 350 K. (a) UC emission spectra under 980 nm laser excitation. The spectra are normalized to the emission peak at 553 nm. (b) FIR, (c) S<sub>A</sub>, and (d) S<sub>R</sub> versus temperature.
